# 1 Inducible Directed Evolution of Complex Phenotypes in 2 Bacteria

3 Ibrahim S. Al'Abri<sup>1</sup>, Daniel J. Haller<sup>1</sup>, Nathan Crook<sup>1\*</sup>

4

5 <sup>1</sup> Department of Chemical and Biomolecular Engineering, North Carolina State University, Raleigh,  
6 North Carolina, USA.

7 \* To whom correspondence should be addressed: [nccrook@ncsu.edu](mailto:nccrook@ncsu.edu)

## 8 **Abstract:**

9 Directed evolution is a powerful method for engineering biology in the absence of detailed  
10 sequence-function relationships. To enable directed evolution of complex phenotypes encoded  
11 by multigene pathways, we require large library sizes for DNA sequences >5-10kb in length,  
12 elimination of genomic hitchhiker mutations, and decoupling of diversification and screening steps.  
13 To meet these challenges, we developed Inducible Directed Evolution (IDE), which uses a  
14 temperate bacteriophage to package large plasmids and transfer them to naive cells after  
15 intracellular mutagenesis. To demonstrate IDE, we evolved a 5-gene pathway from *Bacillus*  
16 *licheniformis* that accelerates tagatose catabolism in *Escherichia coli*, resulting in clones with 65%  
17 shorter lag times during growth on tagatose after only two rounds of evolution.

## 18 **Main:**

19 Many important phenotypes emerge from the interactions between multiple genes<sup>1,2</sup>. These  
20 “complex” phenotypes have traditionally encompassed small molecule biosynthesis<sup>3</sup>, tolerance to  
21 inhibitors<sup>4</sup>, and growth in new habitats<sup>5</sup>. However, advances in synthetic biology and metabolic

22 engineering have revealed that even supposedly “simple” phenotypes, such as production of a  
23 recombinant protein, become complex as higher performance is desired. This is because auxiliary  
24 cellular functions, such as chaperone proteins, cell wall synthesis, and secretion machinery can  
25 become limiting in these contexts<sup>6–8</sup>. Clearly, engineering these “systems-level” phenotypes  
26 requires systems-level techniques.

27

28 In bacteria, complex phenotypes can be accessed via adaptive evolution<sup>5,9,10</sup> or iterative genome-  
29 wide expression perturbation screens (e.g. asRNA<sup>11,12</sup>, and CRISPRi/a<sup>13–15</sup>). One downside of  
30 adaptive evolution is the accumulation of genomic hitchhiker mutations, a feature that is  
31 particularly troublesome for biosensor-coupled screens and that makes learning from these  
32 experiments very time-consuming. For asRNA and CRISPRi/a, the researcher is limited to  
33 sampling changes to expression space, rather than the much larger space of protein bioactivity.

34

35 For these reasons, directed evolution is useful because it directs mutations to defined DNA  
36 sequences and samples a much wider sequence space. However, due to the limited length of  
37 DNA that can be evolved using most methods, it has been difficult to apply directed evolution to  
38 complex phenotypes. For example, traditional error-prone PCR-based libraries are effectively  
39 limited to sequences <10kb in length due to reductions in polymerase processivity, cloning  
40 efficiency, and transformation rate above this size. Although recent methods for directed evolution  
41 in bacteria have eliminated many hands-on steps via the use of filamentous phage (e.g. phage-  
42 assisted continuous and non-continuous evolution (PACE, PANCE)<sup>16–18</sup>, phagemid-assisted  
43 continuous evolution (PACEmid)<sup>19</sup> and Phage-and-Robotics- Assisted Near-Continuous  
44 Evolution (PRANCE)<sup>20</sup>), they are limited to small regions of DNA (<5kb) and often couple the  
45 mutagenesis and screening steps. This is because the phage used in these techniques (M13)  
46 has a strict packaging limit (5 kb) and is engineered to replicate as soon as a certain threshold of

47 biological activity has been reached<sup>21</sup>. Indeed, recent implementations of PACE to evolve  
48 multigene pathways (7 kb)<sup>22</sup> have been limited to relatively small libraries (~10<sup>5</sup>).

49

50 Here we add Inducible Directed Evolution, which overcomes these challenges, (IDE, **Figure 1a**)  
51 to the directed evolution toolkit. IDE harnesses the large genomes of temperate phages (40-100  
52 kb) to evolve large DNA segments<sup>23</sup>, avoids the accumulation of off-target genomic mutations,  
53 and decouples mutagenesis and screening steps. The IDE workflow is both simple and flexible.  
54 Pathways of interest are assembled in a phagemid and transformed to a bacterium containing a  
55 helper phage. The master regulator for this phage is placed under inducible control. Next,  
56 mutagenesis is induced to create random mutations. Then, the phage lytic cycle is induced to  
57 initiate phagemid packaging and cell lysis. The resulting phage particles can then be applied to  
58 an unmutated strain to start a screening step or another mutagenesis step. We demonstrated IDE  
59 using a modified version of the P1 phage (P1kcΔcoi::KanR (ISA137) and P1kcΔcoi (ISA221)) that  
60 undergoes lysis in response to the addition of arabinose. Arabinose induces the expression of *coi*  
61 to inhibit *c1*, which is the master repressor of lysis<sup>24</sup>. This was achieved by knocking out *coi*, which  
62 encodes a repressor of *c1*, and placing it under the control of an arabinose-inducible promoter on  
63 a P1 phagemid (PM)<sup>24</sup>. In the uninduced state, *c1* is expressed and maintains P1 lysogeny. After  
64 *coi* induction, *c1* can no longer maintain lysogeny, resulting in P1 particle production and lysis.  
65 Inducible mutagenesis was achieved using a previously-described plasmid (MP6)<sup>25</sup>.

66

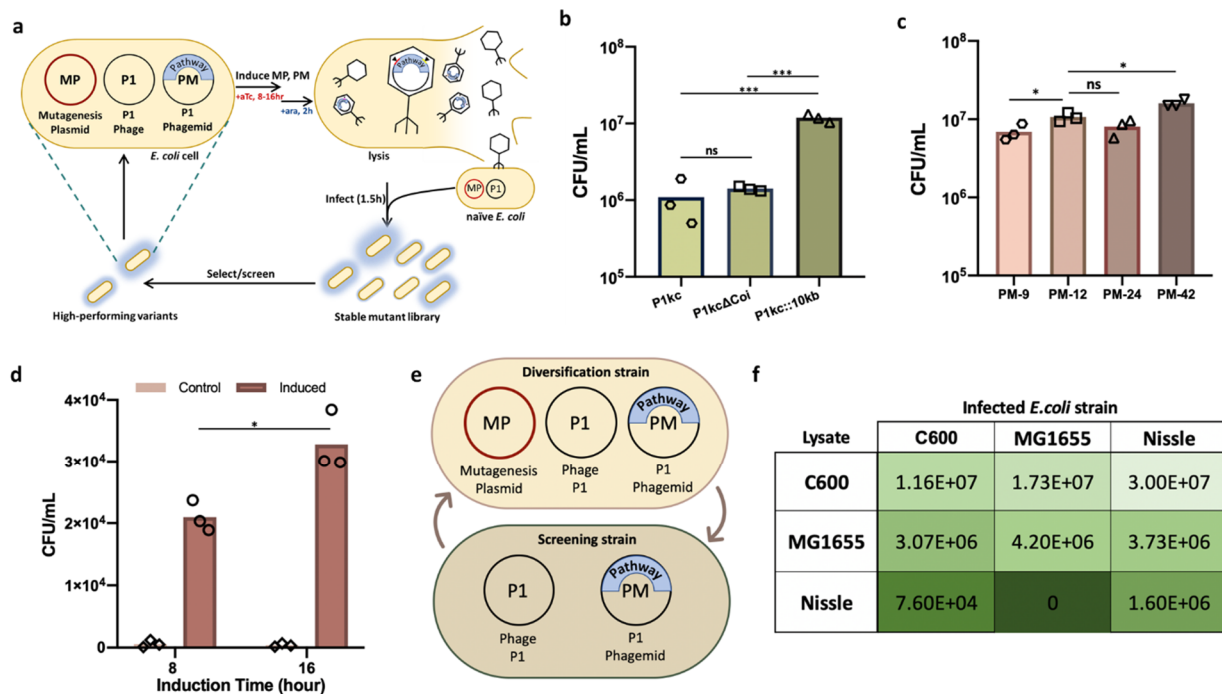

**Figure 1. IDE overview and Optimization.** **a.** IDE overview. **b.** Engineered P1kc (P1kc::10kb and P1kcΔCoi) increases packaging/infection rates of phagemid compared to wild-type P1kc. **c.** The effect of insert size on phagemid transfer is negligible. PM-9 (9.7 kbp), PM-12 (12.8 kbp), PM-24 (24.0 kbp), and PM-42.0 (42.0 kbp) phagemid were packaged from the same strain (*E. coli* C600) containing P1kc::10kb and same amount of phage lysate is used to infect wild-type *E. coli* C600. **d.** Single stop codon reversion in *CmR*. A single stop codon was introduced to *CmR* and reverted via AIDE, 3 replicate cultures were evolved to gain *CmR* function **e.** Overview of using different *E. coli* strains in an IDE cycle for diversification and screening steps. **f.** Heat map summarizes infection/packaging rates (CFU/mL) of phage lysate produced from different *E. coli* strains (C600, MG1655 or Nissle) and used to infect the same 3 strains.

67

68 We first focused on P1 phagemid packaging and infection levels, as these metrics define the

69 number of library members that can be passaged between evolutionary rounds and affect the

70 explorable sequence space. Prior reports of lysate production using P1 were performed by diluting

71 stationary, P1-containing cultures 100-fold into phage lysate medium (PLM) for 1 h at 37 °C

72 followed by induction of lysis via addition of 13 mM arabinose for 1-4 hours at 37 °C<sup>24,26</sup>. The

73 produced phage lysate was used to infect a stationary-phase culture of *E. coli* KL739 at 37 °C for

74 30 minutes without shaking<sup>24,26</sup>. This lysate production and infection approach produced 2500

75 CFU/25 μL lysate<sup>24</sup>.

76

77 We began by inducing phage production in a much larger *E. coli* C600 culture (OD 1,  
78  $5 \times 10^8$  cells/mL) containing P1kc $\Delta$ coi (ISA221) and PM-12 (ISA012). The resulting lysate (1mL)  
79 was applied to  $3 \times 10^8$  *E. coli* C600 cells containing P1kc $\Delta$ coi and plated on media selective for PM.  
80  $6.1 \times 10^5$  PM-containing cells were obtained. To increase this value, we first investigated the  
81 composition of the media in which cell growth and infection was performed.  $\text{Ca}^{2+}$  ( $\text{CaCl}_2$ ) is  
82 required for P1 adsorption to lipopolysaccharide (LPS), and adding  $\text{Mg}^{2+}$  ( $\text{MgCl}_2$ ) helps gram-  
83 negative bacteria stabilize negatively charged lipopolysaccharides on the membrane<sup>27-29</sup>.  
84 Therefore, 100 mM  $\text{MgCl}_2$  and 5 mM  $\text{CaCl}_2$  are commonly added to LB media (forming phage  
85 lysate medium (PLM)) in studies of P1 phage<sup>24,26</sup>. We hypothesized that increasing the  
86 concentration of  $\text{MgCl}_2$  and  $\text{CaCl}_2$  would enhance P1 infection rates. We found that when the  
87 concentration of both salts in PLM is increased by 40%, the number of PM-containing cells  
88 increased 2.2-fold to  $1.3 \times 10^6$ . We called the new medium ePLM (**Figure S1**).

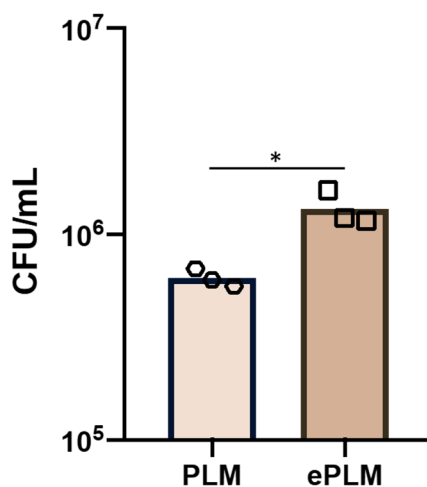

**Figure S1.** Increasing salt composition ( $\text{MgCl}_2$  and  $\text{CaCl}_2$ ) in the growth medium influences phage infection rate. Each dot represents one biological replicate.

89

90 We next varied the optical density to which the recipient cells were grown, while keeping the total  
91 number of recipient cells constant. We found that our initial strategy of growing cells to an optical  
92 density of 1.0 yielded the highest infection rates (**Figure S2**).

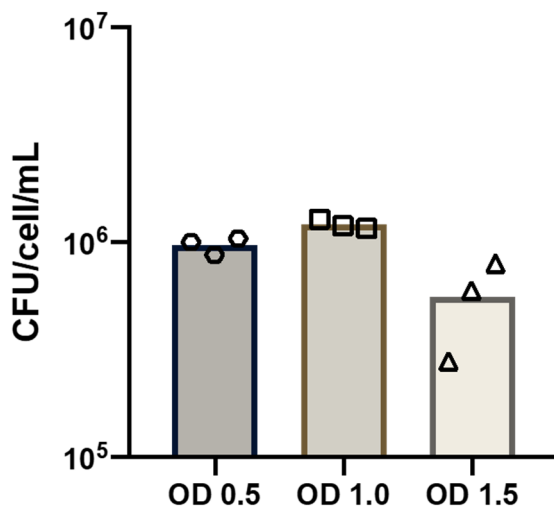

**Figure S2.** The physiological state of cells (*E. coli* C600) affects phagemid infection rate. Each dot represents one biological replicate.

93  
94 Next, we hypothesized that reducing the ability of P1kc $\Delta$ coi to be packaged in phagemids would  
95 increase the proportion of particles carrying PM. We found that inserting 10kb of yeast DNA into  
96 P1kc (generating P1kc:10kb::KanR (ISA138) and P1kc::10kb (ISA222)) increased transferable  
97 library size by an additional 9.2-fold, to  $1.2 \times 10^7$  (**Figure 1b,S3**). Similarly, we found that PM  
98 packaging was copy-number dependent, with lower PM copy numbers resulting in a reduced  
99 number of transduced cells (**Figure S4**). Taken together, over the course of these optimization  
100 experiments we were able to increase P1 transduction rates by more than 4,800 fold over previous  
101 methods<sup>24,30</sup>.

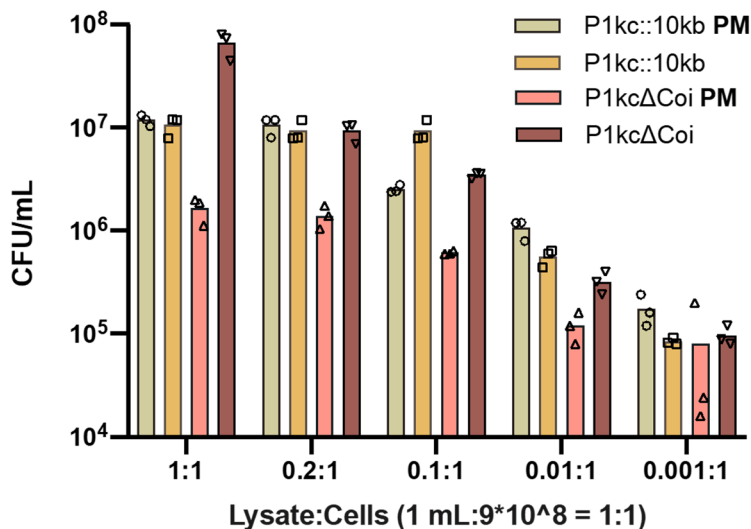

**Figure S3.** The ratio of lysate produced from strains containing phagemid and P1::10kb or P1ΔCoi affects the amount of the size of the library passed in each cycle. Each dot represents one biological replicate.

102

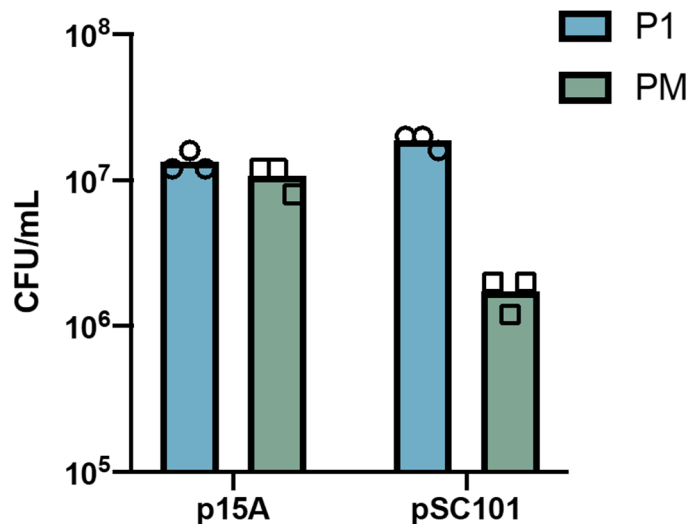

**Figure S4.** The copy number of phagemid impacts packaging and infection rates in the context of P1kc::10kb. Each dot represents one biological replicate.

103

104 Although we expected that increasing the amount of lysate applied to naive cells would increase  
 105 the number of transduced cells, we found that the ratio we had been using (lysate from  $5 \times 10^8$  cells  
 106 applied to  $3 \times 10^8$  cells, defined as a ratio of 1:1) was past its saturation level, with reduced amounts  
 107 of lysate providing similar values (**Figure S3**). Therefore, we varied the number of naive cells,

108 holding the lysate volume constant. As expected, we observed a linear relationship between the  
109 number of naive cells and the number of infected cells (**Figure S5**), indicating that IDE library  
110 sizes can be easily increased by scaling up lysate and cell amounts.

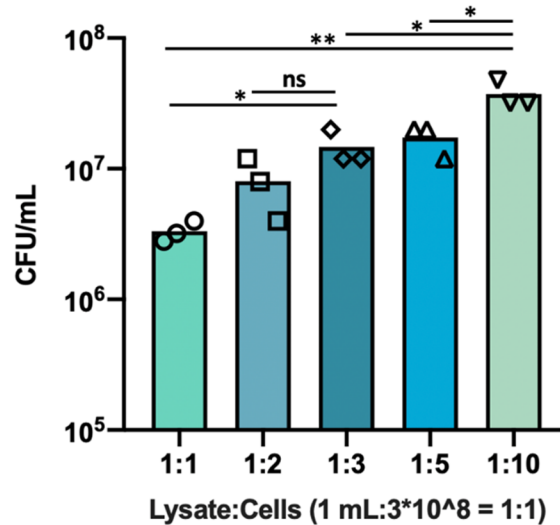

**Figure S5.** The amount of infected cells grown to OD 1 affect the size of the library passed in each IDE cycle. 3 biological replicates of *E. coli* C600 cells were grown to OD 1 and concentrated to 1x, 2x, 3x, 5x and 10x and then infected with phage lysate produced from *E. coli* C600.

111  
112 Using these improved conditions, we investigated the effect of PM size on the number of  
113 transduced cells. We observed no reduction in library size with increasing cargo length, up to the  
114 largest phagemid we have tested (PM-42, 42.0 kb) (**Figure 1c**). While we expect a substantial  
115 reduction of library size with phagemids larger than wild-type P1 (**Figure 1b**), this indicates that  
116 IDE is capable of efficiently evolving large multi-gene pathways. In comparison, when these  
117 phagemids were transformed via electroporation, the transformation efficiency decreased  
118 dramatically as the size of the phagemid increased, up to the size of the P1 genome (90kb)  
119 (**Figure S6**). In addition to the inefficiency of electroporating large plasmids, isolating and  
120 transforming large phagemids (e.g. via a kit) is costly and difficult to scale up compared to IDE  
121 (simple addition of inducer), making IDE a desirable approach for directed evolution of large  
122 phagemids.



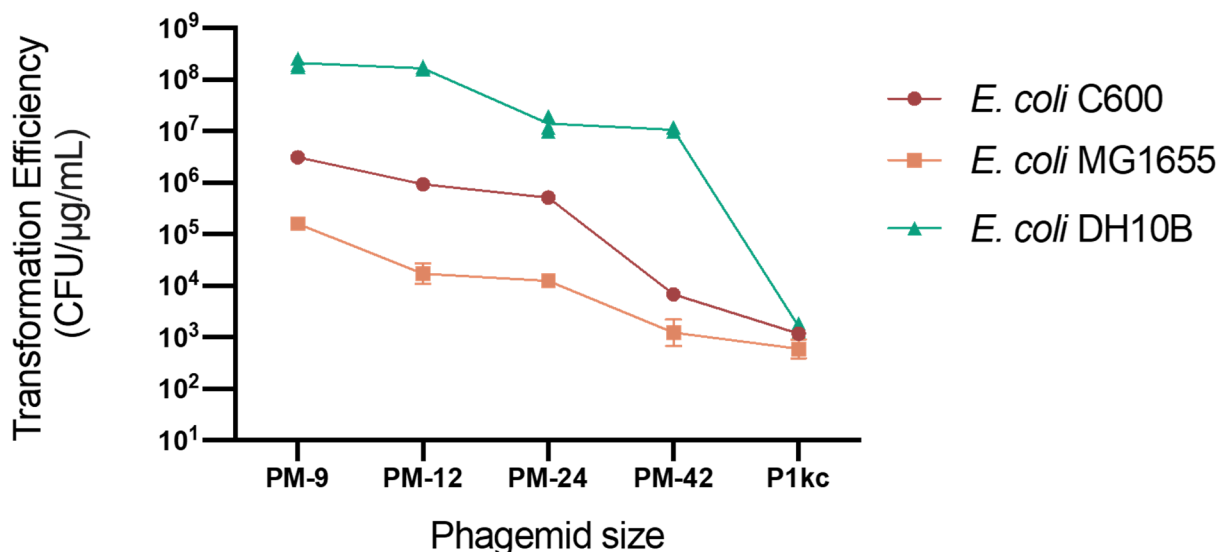

**Figure S6.** Transformation efficiency of *E. coli* C600, MG1655 and DH10β by different size phagemids. 1 μg of each phagemid was transformed into freshly prepared electrocompetent cells.

123  
124 Having established efficient transfer of phagemids between cell populations, we next asked  
125 whether we could achieve mutations at rates sufficient for directed evolution. For this purpose,  
126 we modified a previously-reported plasmid enabling inducible mutagenesis (MP6)<sup>25</sup>. To ensure  
127 compatibility with PM, we switched this plasmid to an anhydrotetracycline (aTc)-inducible  
128 promoter and a kanamycin selection marker, forming aTc-MP. To test the mutation rate conferred  
129 by aTc-MP, we inserted a chloramphenicol resistance gene (*CmR*) with one premature stop  
130 codon into PM (ISA308 and ISA311). We expected that inducing aTc-MP would randomly mutate  
131 *CmR* and yield variants with the stop codon reverted to a functional codon. We observed time-  
132 dependent increases in the number of *CmR*-resistant cells after 16h of induction (up to 5.4\*10<sup>-5</sup>  
133 substitutions per base pair (bp), similar to the mutation rate of the original MP6<sup>25</sup>), supporting the  
134 notion that IDE enables tunable mutagenesis of defined DNA cargo (**Figure 1d**). Omitting the  
135 inducer revealed that aTc-MP has a very tight off state, indicating that aTc-MP is suitable for  
136 inclusion in cells during selection or screening steps. Additionally, we found that induction of aTc-  
137 MP enabled the simultaneous reversion of two premature stop codons in *CmR* (ISA363) at a rate

138 of 3 per  $5 \times 10^8$  induced cells, demonstrating the large library sizes attainable with this mutagenesis  
 139 technique. The expected reversion mutations were confirmed via sequencing (**Figure S7**).

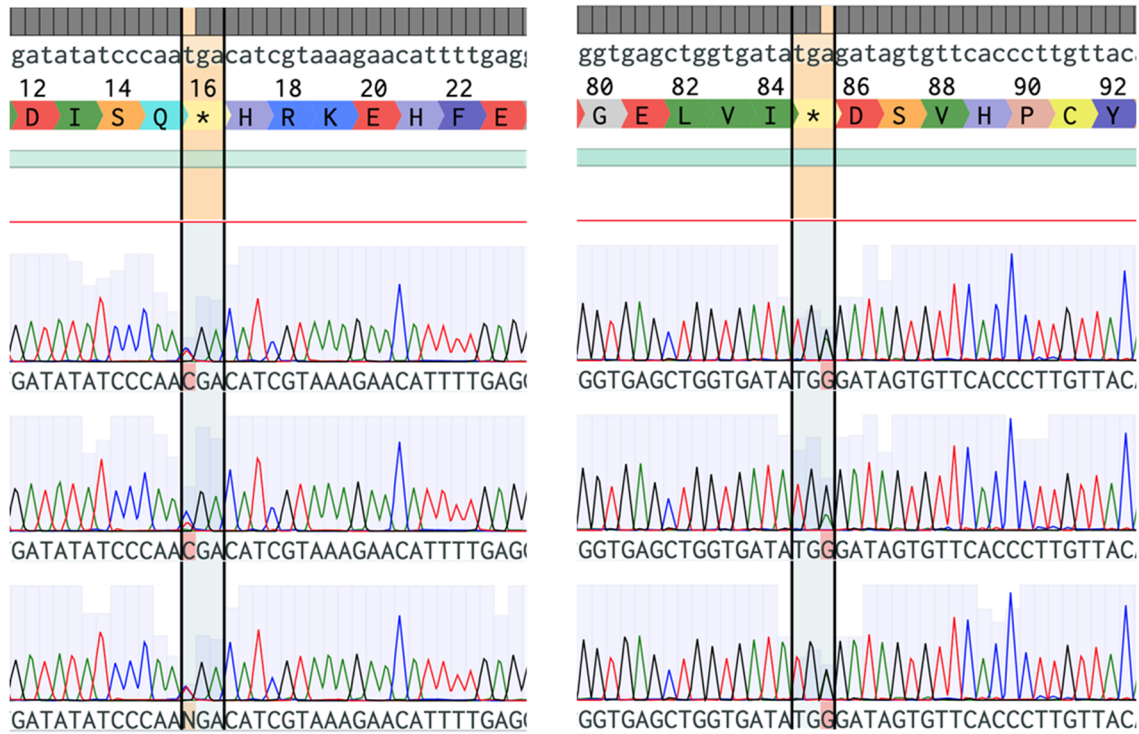

**Figure S7.** Sanger sequencing shows the reversion of two premature stop codons inserted in *CmR* at codons 16 and 85. Both codons were originally Trp (TGG). Double peaks indicate that the cells have two copies of the phagemids (one with stop codon and one with reverted stop codon).

140  
 141 Because mutagenesis and screening steps are decoupled in IDE, we hypothesized that the strain  
 142 that is used for screening does not have to be the same as the strain that is used for library  
 143 generation (**Figure 1e**). This would be beneficial if the ideal screening strain has a limited phage  
 144 production capacity. As examples, we found that phage lysate produced from  $10^8$  *E. coli* C600  
 145 cells can passage  $>10^7$  variants to *E. coli* MG1655 and *E. coli* Nissle 1917 (**Figure 1f**). On the  
 146 other hand, the same number of *E. coli* MG1655 and *E. coli* Nissle cells can only passage  $4.9 \times 10^6$   
 147 and  $6.9 \times 10^4$  variants back to C600 (**Figure 1g**), respectively. These results indicate that C600 is  
 148 well-suited for production and packaging of large libraries, enabling these libraries to be screened  
 149 in a more appropriate strain, for example incorporating biosensors or production-coupled growth  
 150 circuits.

151

152 Because phagemids are transferred to new cells after mutagenesis in IDE, we hypothesized that  
153 recessive phenotypes would be easy to select for. Without passage to fresh cells, recessive  
154 phenotypes would be difficult to observe due to the presence of multiple plasmid copies. We  
155 therefore placed *sfGFP* on PM with medium copy number origin (p15A). Since production of  
156 heterologous proteins incurs a fitness cost, cells containing inactivated *sfGFP* would outcompete  
157 *sfGFP*-producing cells in a mixed culture<sup>32</sup>. Indeed, after 4 IDE cycles comprising mutagenesis,  
158 passage to fresh cells, and cell outgrowth, we found that almost all cells in the culture bore loss-  
159 of-function mutations in *sfGFP* (**Figure S8**). The recessive mutations found in this experiment  
160 were either premature stop codons or previously-reported mutations that diminish GFP production  
161 (**Table S1**)<sup>33</sup>. Loss of GFP fluorescence was not observed in cells that were unmutated (**Figure**  
162 **S8**).

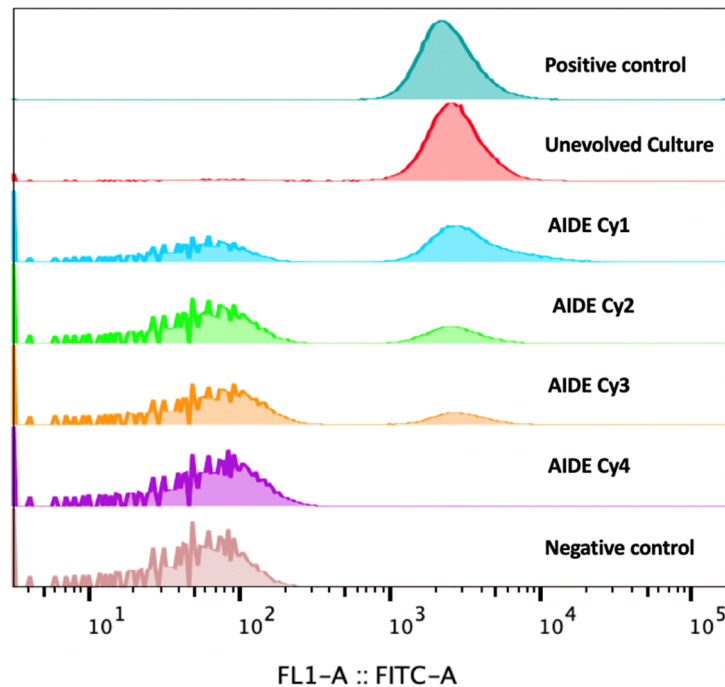

**Figure S8. Directed Evolution of *sfGFP* using IDE.** *sfGFP* phagemid was evolved to test the ability of IDE to passage recessive variants between cells across multiple rounds. The *sfGFP* phagemid went through 4 IDE cycles and was compared using flow cytometry to 1) a phagemid that was not mutagenized but that went through the rest of the IDE steps (unevolved culture), 2) negative controls (harboring an empty plasmid), and 3) positive controls (the starting plasmid).

163

| Amino Acid Change | Sequence   |
|-------------------|------------|
| G33D              | GGT -> GAC |
| P56L              | CCT -> CTC |
| W57*              | TGG -> TGA |
| T62I              | ACC -> ATC |
| TY92*             | TAT -> TAA |
| A110V             | GCG -> GTC |
| G127D             | GGC -> GAC |
| Q157*             | CAA -> TAA |

**Table S1. Detected mutations in the p15A-sfGFP phagemid after 4 IDE cycles.** All mutations were detected in sfGFP. \*=stop codon.

164

165 To demonstrate IDE's capability to evolve a simplistic multi-gene phenotype, we assembled  
166 *sfGFP* on a phagemid containing the *pSC101* origin. We chose the *pSC101* origin because of its  
167 stringent *Rep101*-dependent replication mechanism and its low copy number<sup>34</sup>. In this setting,  
168 GFP fluorescence is controlled by at least 4 different genetic elements (the GFP coding sequence  
169 and its promoter, as well as *Rep101* and its promoter). We wished to know which of these  
170 elements (or combination thereof) would lead to increased cellular fluorescence when mutated.  
171 We found that after two sequential rounds of mutagenesis and passage to fresh cells, (**Figure**  
172 **2a**), we were able to verify 7 highly fluorescent isolates out of 20 visually selected colonies.  
173 Sequencing *Rep101* and *sfGFP* in these 7 isolates yielded mutations exclusively in *Rep101*. To  
174 separate these mutations from unknown mutations potentially present in other parts of PM, we  
175 cloned these *Rep101* variants into an unmutated PM-*sfGFP* vector and measured fluorescence  
176 via flow cytometry. All variants yielded significantly higher fluorescence than wild-type (**Figure**  
177 **2b**). Most of the *Rep101* mutations present in these clones (R46W, M78I, E93G, E93K, K102E,  
178 and E115K) were previously found to increase the copy number of the *pSC101* origin<sup>35</sup>, while one  
179 highly beneficial variant (I94N) was novel. It is therefore likely that the increase in GFP production  
180 in these isolates is due to an increased phagemid copy number. This result is reasonable because

181 *sfGFP* has already been optimized for high stability and fluorescence in prior studies<sup>36</sup>, and so  
 182 increasing the copy number of the plasmid may be an easier path to achieve higher GFP  
 183 expression.

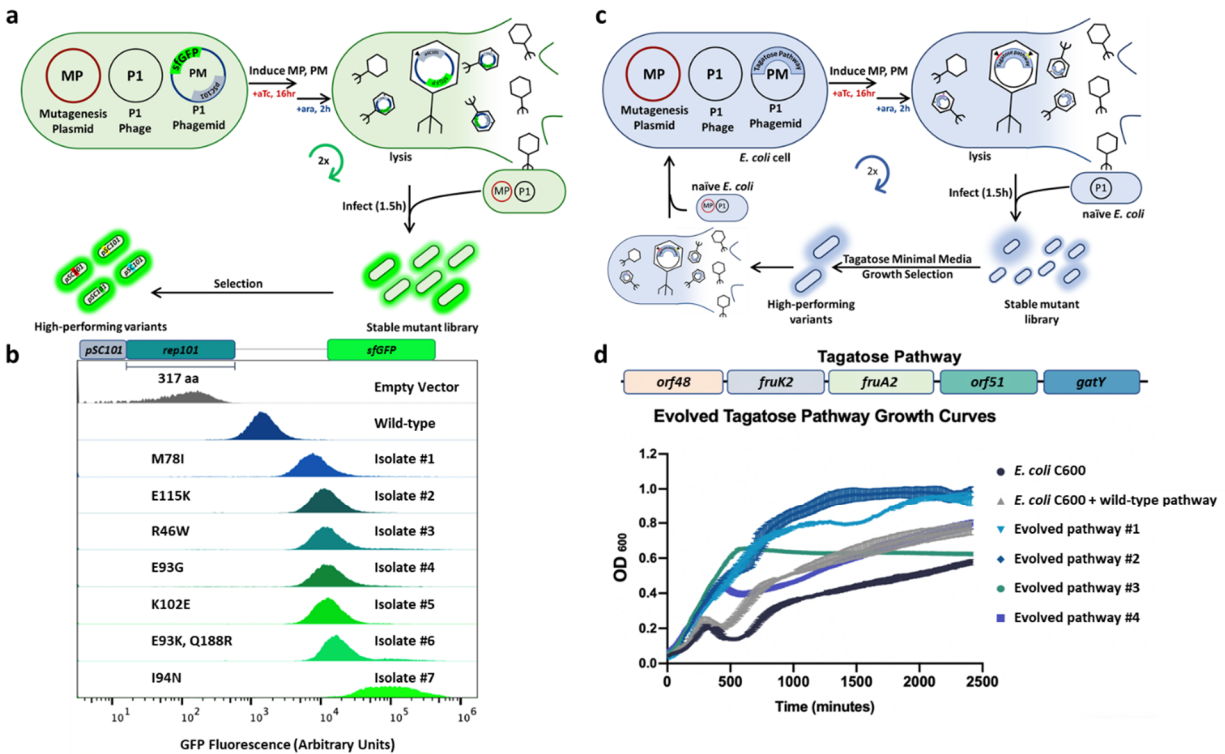

**Figure 2. Directed evolution of complex phenotypes. a.** Overview of evolving pSC101-sfGFP phagemid via IDE. **b.** Flow cytometry histograms of isolated and verified mutants compared to negative and positive controls. All mutations were detected in the *pSC101* origin. **c.** Overview of evolving a tagatose pathway via IDE. **d.** Isolated tagatose pathway variants show improved growth on tagatose minimal media.

184  
 185 Finally, we applied IDE to improve a heterologous tagatose consumption pathway in *E. coli*  
 186 (**Figure 2c**). *E. coli* C600 natively consumes tagatose poorly, taking over 12.5 hours to reach an  
 187 optical density (OD) of 0.25 in media containing tagatose as a sole carbon source from an initial  
 188 OD of 0.05. We chose a five-gene tagatose consumption pathway from *Bacillus licheniformis* for  
 189 insertion in PM (**Figure 2d**)<sup>37</sup>. This pathway consists of *orf48* (encoding a predicted transcriptional  
 190 regulator in the *murR/rpiR* family), *fruA2* and *orf51* (encoding a predicted phosphotransferase  
 191 system that transports D-tagatose into the cell and converts it to tagatose 1-phosphate), *fruK2*

192 (encoding a predicted kinase that converts tagatose 1-phosphate to tagatose 1,6-bisphosphate),  
193 and *gatY* (encoding a predicted aldolase that converts tagatose 1,6-bisphosphate to  
194 dihydroxyacetone phosphate and D-glyceraldehyde 3-phosphate). This pathway is therefore a  
195 good test case for improving complex phenotypes with IDE, as it encodes different functions that  
196 collectively elicit the phenotype of interest. Insertion of this pathway into PM yielded a C600 strain  
197 with a 29% reduction in lag time, taking 8.8 hours to achieve an OD of 0.25 in tagatose media  
198 (**Figure 2d**). We therefore expected that evolving this pathway would lead *E. coli* to consume  
199 tagatose more efficiently. After 2 IDE cycles comprising mutagenesis, growth-based selection,  
200 and transfer to fresh cells (**Figure 2c**), we selected for variants that grew faster in liquid tagatose  
201 media than strains containing the unmutated pathway. We also performed a parallel selection  
202 comprising the same steps, except that mutagenesis was not performed. Phagemids present in  
203 cells surviving both selections were transferred to fresh *E. coli* C600, and the growth of strains  
204 forming large colonies on tagatose minimal media agar plates was assayed in microtiter plates  
205 (**Figures S9 and S10**). Strains from the mutagenic selection exhibited significantly higher growth  
206 in tagatose minimal media than strains from the nonmutagenic selection ( $p < 10^{-8}$ , Student's T  
207 test) (**Figure S11**). Eight strains from the mutagenic selection exhibiting the best combinations of  
208 growth rate and final optical density were cloned into a wild type phagemid backbone (ISA012) to  
209 verify increased growth (**Figure S12a**). Of these, four pathways conferred increased growth,  
210 relative to the wild-type sequence (**Figure 2c and S12b**). All four variants exhibited some  
211 combination of higher optical density (strain E3 exhibited a 2.6-fold higher cell density at 500  
212 minutes than a strain containing the unmutated pathway) and reduced lag time (strain E3  
213 exhibited a 64% reduction in time to reach an optical density of 0.25 than a strain containing the  
214 unmutated pathway). Mutations were identified in different genes, as shown in **table S2**. Isolates  
215 E1 and E2 have mutations across two sets of 3 different genes (*orf48*, *fruA2*, and *gatY* for E1,  
216 *fruK2*, *fruA2*, and *gatY* for E2), while isolates E3 and E4 share one mutation in the ribosome  
217 binding site (RBS) of *fruK2*. This is the only mutation present in E4, while E3 contains two others

218 (a silent mutation in *fruK2* and a coding mutation in *orf48*) that together further increase growth.  
219 The accumulation of fitness-enhancing mutations across multiple genes agrees with prior studies  
220 pointing to the utility of a pathway-wide approach to directed evolution<sup>22,38</sup>.

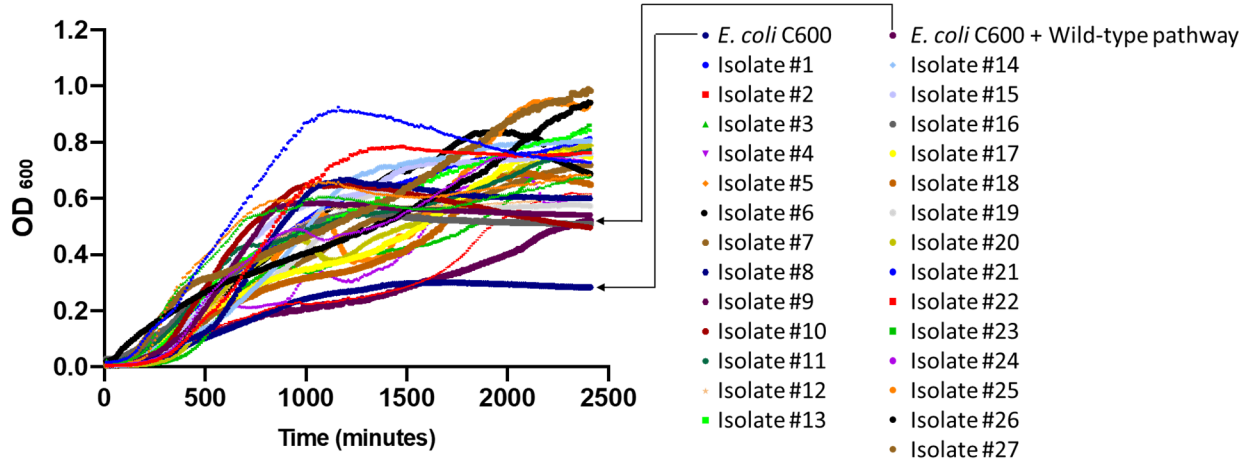

221 **Figure S9. Growth curves of 27 tagatose variants.** 27 colonies were picked from tagatose agar plates after 2 rounds of mutagenesis and selection. These colonies were grown in liquid tagatose media in a plate reader with wild-type *E. coli* C600 and *E. coli* C600 containing the wild-type pathway.

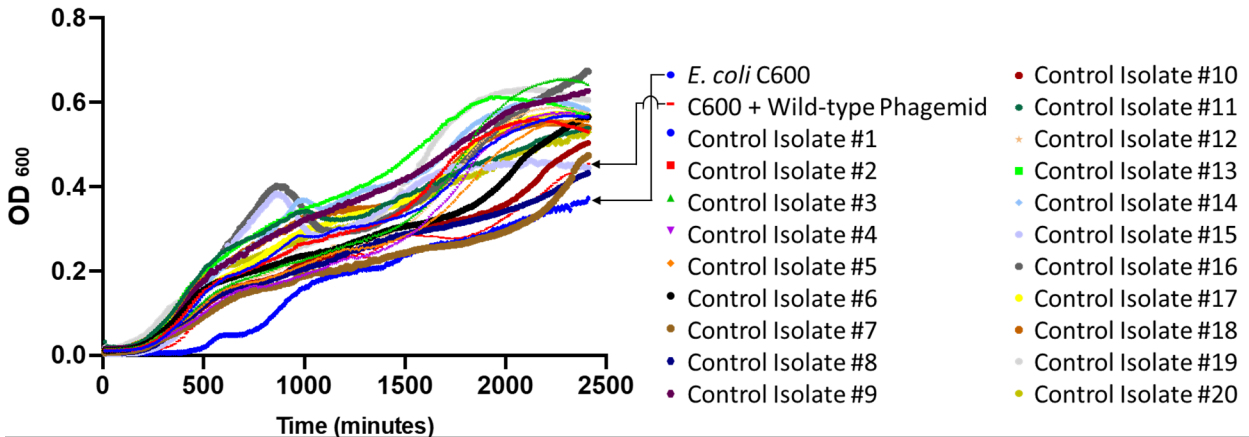

222 **Figure S10. Growth curves of control colonies.** 20 colonies were picked after 2 rounds of selection without mutagenesis. Colonies were picked from tagatose agar plates and grown in a plate reader.

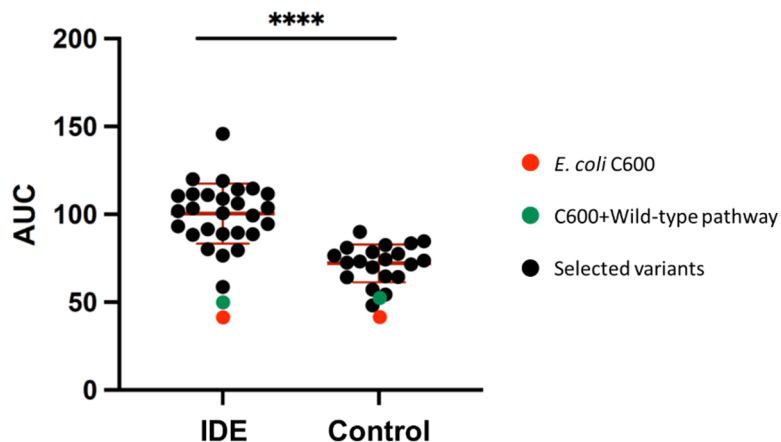

**Figure S11. Comparing growth characteristics of variants isolated from IDE and Control tagatose selections.** Variants from IDE and control selections were grown in tagatose minimal media and optical density was measured over time in a microplate reader. AUC (Area Under the Curve) is calculated by summing OD600 values obtained over the course of the experiment. \*\*\*\* -  $p < 10^{-8}$ , Student's T test.

223

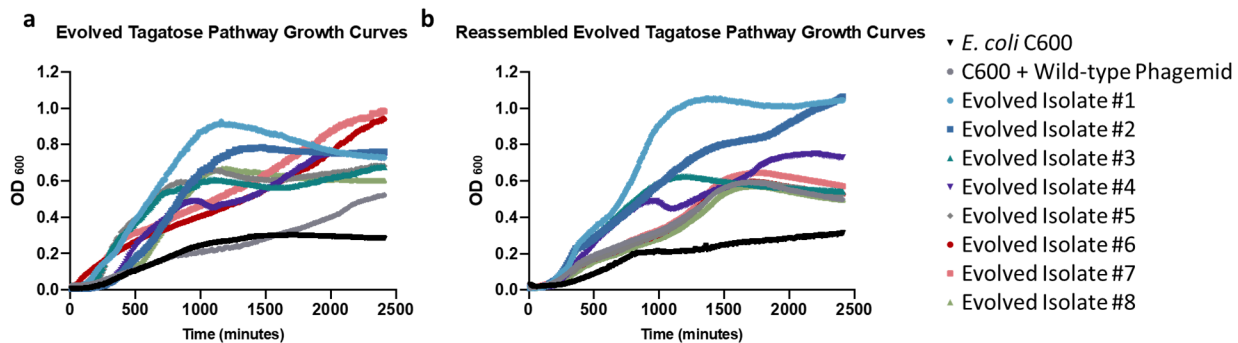

**Figure S12. Growth curves of the selected tagatose variants.** **a.** 8 variants were picked out of 27 isolates that were picked initially from tagatose agar plates and confirmed in plate reader. **b.** Tagatose pathways from the 8 selected variants were assembled into unmutated backbone and grown in tagatose minimal media.

224



| Amino Acid Change | Sequence    | Gene         | Isolate |
|-------------------|-------------|--------------|---------|
| V56A              | GTT --> GCT | <i>orf48</i> | E3      |
| Q127K             | CAA --> AAA | <i>orf48</i> | E1      |
| RBS               | A --> G     | <i>fruK2</i> | E3,E4   |
| P47P              | CCA --> CCC | <i>fruK2</i> | E2      |
| R149R             | AGA --> AGG | <i>fruK2</i> | E3      |
| A183T             | GCA --> ACA | <i>fruA2</i> | E1      |
| V428A             | GTA --> GCA | <i>fruA2</i> | E2      |
| A39A              | GCC --> GCT | <i>gatY</i>  | E2      |
| Y55D              | TAT --> GAT | <i>gatY</i>  | E2      |
| P255L             | CCA --> CTA | <i>gatY</i>  | E1      |

**Table 2. Mutations detected in evolved tagatose consumption pathways.** RBS indicates mutations were detected in the ribosome binding site. Grey filling indicates silent mutations. E# indicates the number of the evolved isolate.

225  
226 As microbial engineering moves toward applications demanding ever-higher performance (e.g.  
227 green production of fuels<sup>39</sup> and chemicals<sup>40</sup>, sensing<sup>41</sup> and biosynthesis on host-associated  
228 sites<sup>42</sup>), the ability to engineer complex phenotypes is becoming increasingly important. Currently,  
229 optimizing the performance of multi-gene pathways is a challenging task. IDE offers the ability to  
230 perform directed evolution on long (at least up to 42 kbp) sequences of DNA with tunable error  
231 rates (up to  $5.4 \times 10^{-6}$  substitutions per bp per generation) and library sizes that scale trivially with  
232 culture volume (up to 4% of recipient cells contain mutants). We expect that the use of different  
233 mutagenesis methods (e.g. ultraviolet light and chemical mutagens) in place of a mutagenesis  
234 plasmid can add further mutational flexibility. Importantly, the use of temperate phages (such as  
235 P1) to passage variants to fresh hosts greatly reduces the impact of off-target mutations and  
236 decouples mutagenesis and screening steps, providing a large degree of flexibility when  
237 designing selections. In particular, we expect this approach to be highly amenable to automation,  
238 enabling rapid and highly parallel evolution campaigns similar to the eVOLVER<sup>10</sup>, PACE<sup>18</sup>, and  
239 PRANCE<sup>20</sup> systems. Taken together, IDE demonstrates that temperate phages are promising  
240 vehicles for directed evolution of complex phenotypes.

## 241 Methods:

242 **Strains and Media:** *E. coli* Top10, NEB 5 $\alpha$  and NEB 10 $\beta$  were used for plasmid construction. *E.*  
243 *coli* C600 (CGSC 5394 C600) was used for optimization infection and packaging rates. *E. coli*  
244 Nissle 1917 and *E. coli* MG1655 were used to test IDE's applicability to different *E. coli* strains.  
245 All *E. coli* strains were grown in lysogeny broth (LB) (5g/L yeast extract, 10 g/L tryptone, 10 g/L  
246 NaCl) at 37 °C supplemented with ampicillin (Amp) (100  $\mu$ g/mL), kanamycin (Kan) (50  $\mu$ g/mL) or  
247 chloramphenicol (Cm) (34  $\mu$ g/mL). Strains containing mutagenesis plasmids were grown in LB  
248 containing 1% (w/v) d-glucose and appropriate antibiotics. *Bacillus licheniformis* (ATCC®  
249 14580™) was grown in Difco™ Nutrient Broth. All infection and packaging experiments were  
250 performed in Phage Lysate Media (PLM, LB with 100 mM MgCl<sub>2</sub> and 5 mM CaCl<sub>2</sub>) or enhanced  
251 PLM (ePLM, LB 140 mM MgCl<sub>2</sub> and 7 mM CaCl<sub>2</sub>). P1kc $\Delta$ coi::KanR and P1kc:10kb::KanR were  
252 gifts from Dr. Chase Beisel.

253

254 **Preparation and transformation of electrocompetent cells:** Overnight cultures of the desired  
255 strains were inoculated (1:100 dilution) to 50 mL LB media containing appropriate antibiotics and  
256 grown to OD 0.8 at 37 °C and 250 rpm. Cells were then chilled on ice for 15 minutes before being  
257 pelleted by centrifugation at 3000 xg for 5 minutes. Cells were then washed twice via  
258 resuspension in 25 mL 10% glycerol and pelleting via centrifugation at 3000 xg for 5 minutes.  
259 Washed cells were then resuspended in 1 mL 10% glycerol and pelleted at 4000 xg for 3 minutes  
260 in eppendorf microcentrifuge tubes. The resulting pellets were then resuspended in 0.5 mL 10%  
261 glycerol and divided into 50  $\mu$ L aliquots that were either used for transformation immediately or  
262 stored at -80 °C. Frozen cells were thawed on ice for 10 minutes before being used for  
263 transformation. Fresh cells yielded higher transformation efficiency.

264

265 **Cloning:** Primers used in this study were obtained from Eurofins and are listed in Table S3.  
266 Plasmids and phagemids are listed in Table S4. NEBuilder® HiFi DNA Assembly Master Mix was  
267 used for plasmid and phagemid construction. SGI-DNA Gibson Assembly® (GA) HiFi 1-Step Kit  
268 assembly was used for construction of large phagemids. NEB Q5® Site-Directed Mutagenesis Kit  
269 was used to introduce point mutations. Addgene #40782 was used as the backbone for all  
270 phagemid cloning, and primers 1 and 2 are used to amplify this backbone for gibson cloning.

271

272 **Construction of large phagemids:** A 24.0 kbp P1 phagemid (Addgene #40784) was used as a  
273 backbone for constructing a 42 kbp phagemid (PM-42.0). To construct this phagemid, 3 PCR  
274 reactions were used to amplify 5-7 kbp fragments from the *Saccharomyces cerevisiae* genome in  
275 addition to the phagemid backbone. Q5® High-Fidelity 2X Master Mix was used to amplify the  
276 parts and SGI-DNA Gibson Assembly® (GA) HiFi 1-Step Kit was used to assemble the parts. The  
277 assembled product was transformed into *E. coli* DH10B (ISA585). ZymoPURE™ II Plasmid  
278 Midiprep Kit (Catalog No. D4200 & D4201) was used to extract PM-42.0 from ISA585.

279

280 **Phage Production:** Overnight cultures of strains containing P1 and phagemid were  
281 subinoculated in ePLM (1:100 dilution) with appropriate antibiotics. At OD 0.8-1.0 cell cultures  
282 were induced with 20% L-arabinose (1/100 culture volume) and put back to the shaking incubator  
283 (37 °C, 250 rpm). After 2 hours, the cultures were removed from the incubator and transferred to  
284 15 mL centrifuge tubes containing chloroform. The tubes were left on ice for 5 minutes with gentle  
285 mixing or pipetting every minute. The tubes were then centrifuged at 3000 xg for 10 minutes at  
286 4 °C. The produced phage (present in the supernatant) were then transferred to sterile tubes for  
287 storage. Phage lysate is stable at 4 °C for 1 year and indefinitely at -80 °C.

288

289 **Phage Infection:** An overnight culture grown in LB with the appropriate antibiotics was  
290 subinoculated into ePLM (1:100 dilution). At OD 1, the cells were spun down at 3000 xg for 5

291 minutes. The supernatant was discarded and the pellet was resuspended in  $\frac{1}{3}$  volume fresh ePLM.  
292 The cells were then added to phage lysate in a 14 mL falcon culture tube. The infection mixture  
293 was incubated in a 37 °C incubator (250 rpm shaking) for 20 minutes and then moved to a 37 °C  
294 standing incubator for 20 minutes. The infection mixture was quenched with 1 mL of Super  
295 Optimal Broth (SOC) containing 200 mM sodium citrate. The mixture was then incubated for 40  
296 minutes in a 37 °C shaking incubator before being transferred to 50 mL LB media with the  
297 appropriate antibiotics or plated on LB agar plates containing the appropriate antibiotics.

298

299 **Cell growth phase experiments:** Three *E. coli* C600 colonies grown overnight in LB containing  
300 the appropriate antibiotics were subinoculated (1:100, 1:200 and 1:300 dilution) into three 50 mL  
301 PLM and grown to OD 0.5, 1.0 and 1.5 in shaking incubator (37 °C 250 rpm). Cell cultures were  
302 harvested (3000 xg for 5 minutes) and resuspended with PLM to obtain the same cell count per  
303 mL ( $3 \times 10^8$  CFU/mL). The cultures were then infected with lysate produced from ISA199 (*E. coli*  
304 C600 containing P1kc and 12 kbp phagemid). Infected cultures were plated on LB+Cm to count  
305 CFU/mL.

306

307 **Large phagemid infection rate experiments:** PM-9 (9.7 kbp), PM-12 (12.8 kbp), PM-24 (24.0  
308 kbp), and PM-42.0 (42.0 kbp) phagemids were transformed into *E. coli* C600 containing only  
309 P1kc:10kb or P1kc:10kb and aTc-MP. Phage lysate was produced from each strain as above and  
310 then used to infect wild type *E. coli* C600 or *E. coli* C600 containing P1kc::10kb. Infected strains  
311 were plated on LB+Cm plates to count CFU/mL.

312

313 **Infecting different *E. coli* Strains:** The 12 kbp phagemid was transformed into *E. coli* C600,  
314 MG1655, and Nissle containing P1kc:10kb::KanR. 3 biological replicates from the transformed  
315 strains were grown overnight in LB+Cm and used for phage production. Phage lysate from each  
316 strain was used to infect wild type *E. coli* C600, MG1655, and Nissle.

317

318 **Flip recombinase to delete *KanR* from P1kc $\Delta$ coi::KanR and P1kc:10kb::KanR:** Adapted from  
319 barricklab.org<sup>43</sup>. In brief, *E. coli* C600 containing P1kc $\Delta$ coi::KanR (ISA137) and P1kc:10kb::KanR  
320 (ISA138) were first transformed with pCP20 and plated in LB+Ampicillin agar plates and grown  
321 overnight at 30 °C. Grown colonies were inoculated into 1.0 mL of LB in eppendorf microcentrifuge  
322 tubes and grown overnight at 43°C to induce FLP recombinase expression and plasmid loss.  
323 Colonies were then screened for loss of *KanR* from the phage genome via plating in LB+Kan,  
324 LB+Amp and LB only plates.

325

326 **Single and double Stop codon reversion:** *AmpR* was inserted into a phagemid backbone  
327 (ISA012) via Gibson assembly. Mutations were introduced via Q5 SDM to introduce either one or  
328 two stop codons in *CmR*. This phagemid, with a difunctional *CmR*, was transformed into *E. coli*  
329 C600 containing aTc-MP and P1 phage (ISA308, ISA311 and ISA363). 3 biological replicates  
330 were grown overnight in LB containing 1% glucose, kanamycin, and ampicillin. The overnight  
331 cultures were plated in LB/Cm agar plates to check for escapers and background aTc-MP activity;  
332 no escapers were detected. The cultures were spun down at 4000 xg for 3 minutes in eppendorf  
333 microcentrifuge tubes and washed with 1X PBS twice to remove the residual glucose from the  
334 media. Washed cells were then transferred to LB media containing kanamycin and ampicillin  
335 (1:1000) and with or without 200 ng/mL aTc to induce aTc-MP. The cultures were plated after 8  
336 hours or 16 hours of induction on LB+Cm plates to count the number of resistant colonies.  
337 Random colonies were picked to verify stop codon reversion.

338

339 **Isolation of recessive mutations in p15A-sfGFP via IDE (see Supplementary Methods):** The  
340 p15A origin and *sfGFP* were inserted into ISA012 via Gibson assembly (ISA010). The resulting  
341 phagemid (p15A-sfGFP) was transformed into *E. coli* C600 containing P1kc:10kb and aTc-MP

342 (ISA384). In short, the p15A-sfGFP phagemid was mutated, transferred to fresh cells, and  
343 selected for higher fitness via outgrowth a total of 4 times. The phage lysates produced from each  
344 round's stationary phase cultures were used to infect wild type *E. coli* C600. These strains were  
345 analyzed via flow cytometry to compare their fluorescence to that of empty vector, wild-type, and  
346 cell cultures that passed through the steps with the exception of mutagenesis. Flow cytometry  
347 data was analyzed with FlowJo (FlowJo LLC). The *sfGFP* gene from 5-10 colonies was amplified  
348 via PCR and sequenced by Sanger sequencing to detect mutations.

349

350 **Improving pSC101-sfGFP fluorescence via IDE (see Supplementary Methods):** The pSC101  
351 origin and *sfGFP* were inserted into ISA012 via Gibson assembly. The resulting phagemid  
352 (pSC101-sfGFP) was then transformed into *E. coli* C600 containing aTc-MP and P1kc:10kb  
353 (ISA426). The resulting strain was mutated 2 times before selection for increased colony  
354 fluorescence. Colonies that exhibited higher GFP fluorescence were visually identified and  
355 analyzed via flow cytometry to quantify GFP production. Mutations that were found in pSC101  
356 were introduced to the unevolved phagemid via Q5 SDM, transformed into *E. coli* C600, and  
357 analyzed via flow cytometry to confirm their causal effects.

358

359 **Tagatose evolution (see Supplementary Methods):** The tagatose pathway from *Bacillus*  
360 *licheniformis* (ATCC® 14580™) was inserted into ISA012 via Gibson assembly. The phagemid  
361 was then transformed into *E. coli* C600 containing aTc-MP and P1kc:10kb. The resulting strain  
362 was evolved through two rounds of diversification and selection as shown in Figure S12. The  
363 resulting phage lysate was used to infect wild-type *E. coli* C600, and the resulting cells were plated  
364 on tagatose minimal media agar plates. Large colonies were picked and grown overnight in LB  
365 media containing chloramphenicol. The cultures were then washed with tagatose minimal media  
366 and grown for 40 hours in a plate reader (see methods: growth curves). The pathways in the  
367 colonies with faster growth rates were sequenced via Sanger sequencing. Resulting mutations

368 were then reintroduced to unevolved phagemid via Q5 SDM and analyzed again via growth in  
369 tagatose minimal media.

370

371 **Tagatose Minimal Media:** The selection media for the tagatose minimal media was adapted from  
372 Van der Heiden, *et al.* (2013)<sup>37</sup> with few modifications for *E. coli* C600. 20x Salt solution was  
373 composed of KH<sub>2</sub>PO<sub>4</sub> (54.4 g), K<sub>2</sub>HPO<sub>4</sub> (208.8 g), and NH<sub>4</sub>Cl (12 g) for 1 L solution. 500x mineral  
374 solution was composed of MgCl<sub>2</sub>·6H<sub>2</sub>O (1 g), CaCl<sub>2</sub>·2H<sub>2</sub>O (0.25 g), FeCl<sub>2</sub>·4H<sub>2</sub>O (25 mg),  
375 ZnSO<sub>4</sub>·7H<sub>2</sub>O (25 mg), CoCl<sub>2</sub>·H<sub>2</sub>O (12.5 mg), CuSO<sub>4</sub>·5H<sub>2</sub>O (0.5 mg), and MnSO<sub>4</sub>·H<sub>2</sub>O (0.14 g) in  
376 100 ml solution. 100x vitamin mix (50 ml) was composed of 5 mg of thiamine-HCl, nicotinic acid,  
377 folic acid, d-l-pantothenic acid, d-biotin, leucine, lysine, homoserine and riboflavin and 10 mg of  
378 pyridoxal-HCl. 0.1% (wt/vol) l-Casamino Acids and 1% (wt/vol) tagatose were added to the  
379 minimal media.

380

#### 381 **Growth curves:**

382 3 biological replicates of each isolate were grown overnight in 96-deep-well plates (VWR  
383 International, cat #10755-248) in LB media. Saturated cultures in 96-deep-well were spun down  
384 at 2500 xg for 10 minutes, the supernatant was discarded, and the pellet was resuspended in  
385 tagatose minimal media. These suspensions were spun again at 2500 xg for 10 minutes, the  
386 supernatant was discarded, and the pellet was resuspended in tagatose minimal media one last  
387 time. This culture was then transferred to 96-well-plates (Costar, Corning™ 3788) containing  
388 tagatose minimal media (1:200 dilution) and grown for 40 hours in a plate reader (BioTek  
389 Synergy™ H1, Shake Mode: Double Orbital, Orbital Frequency: continuous shake 365 cpm,  
390 Interval: 10 minutes).

391

392

393 **Acknowledgements:**

394 We thank members of the Crook Lab, and Daphne Collias, Dr. Chase Beisel, Dr. Jennie Fagen,  
395 and Dr. Janetta Hakovirta for valuable discussions and input. We also thank the labs of Dr.  
396 Christopher Anderson (UC Berkeley) for phagemid constructs (Addgene #40782, #40783 and  
397 #40784), Dr. David R. Liu (Harvard University) for the MP6 plasmid (Addgene #69669), and Dr.  
398 Chase Beisel for wild type and engineered P1 bacteriophages. This work was supported by  
399 startup funds from North Carolina State University's Chemical and Biomolecular Engineering  
400 (CBE) Department and NCSU's Faculty Research and Professional Development Fund. I.S.A. is  
401 supported by NCSU CBE startup funds and the Ministry of Higher Education - Oman.

402

#### 403 **Author contributions**

404 I.S.A. and N.C. designed and conceived the study. I.S.A. and D.J.H. conducted all experiments.  
405 N.C. supervised the research. I.S.A., D.J.H., and N.C. wrote the manuscript.

406

#### 407 **Competing interests**

408 I.S.A. and N.C. have filed a patent application related to this work.

409

#### 410 **References:**

- 411 1. Harvey, A. L., Edrada-Ebel, R. & Quinn, R. J. The re-emergence of natural products for drug  
412 discovery in the genomics era. *Nature Reviews Drug Discovery* vol. 14 111–129 (2015).
- 413 2. Crook, N. & Alper, H. S. Classical Strain Improvement. *Engineering Complex Phenotypes in*  
414 *Industrial Strains* 1–33 (2012) doi:10.1002/9781118433034.ch1.
- 415 3. Lee, S. Y. *et al.* A comprehensive metabolic map for production of bio-based chemicals.  
416 *Nature Catalysis* **2**, 18–33 (2019).



- 417 4. Pham, H. L. *et al.* Engineering a riboswitch-based genetic platform for the self-directed  
418 evolution of acid-tolerant phenotypes. *Nat. Commun.* **8**, 411 (2017).
- 419 5. Crook, N. *et al.* Adaptive Strategies of the Candidate Probiotic *E. coli* Nissle in the  
420 Mammalian Gut. *Cell Host Microbe* **25**, 499–512.e8 (2019).
- 421 6. Farkas, Z. *et al.* Hsp70-associated chaperones have a critical role in buffering protein  
422 production costs. *Elife* **7**, (2018).
- 423 7. Tsoi, R. *et al.* Metabolic division of labor in microbial systems. *Proc. Natl. Acad. Sci. U. S. A.*  
424 **115**, 2526–2531 (2018).
- 425 8. Rosano, G. L. & Ceccarelli, E. A. Recombinant protein expression in *Escherichia coli*:  
426 advances and challenges. *Front. Microbiol.* **5**, 172 (2014).
- 427 9. Gleizer, S. *et al.* Conversion of *Escherichia coli* to Generate All Biomass Carbon from CO<sub>2</sub>.  
428 *Cell* **179**, 1255–1263.e12 (2019).
- 429 10. Wong, B. G., Mancuso, C. P., Kiriakov, S., Bashor, C. J. & Khalil, A. S. Precise, automated  
430 control of conditions for high-throughput growth of yeast and bacteria with eVOLVER. *Nat.*  
431 *Biotechnol.* **36**, 614–623 (2018).
- 432 11. Georg, J. & Hess, W. R. cis-antisense RNA, another level of gene regulation in bacteria.  
433 *Microbiol. Mol. Biol. Rev.* **75**, 286–300 (2011).
- 434 12. Meng, J. *et al.* A genome-wide inducible phenotypic screen identifies antisense RNA  
435 constructs silencing *Escherichia coli* essential genes. *FEMS Microbiol. Lett.* **329**, 45–53  
436 (2012).
- 437 13. Bikard, D., Hatoum-Aslan, A., Mucida, D. & Marraffini, L. A. CRISPR interference can prevent  
438 natural transformation and virulence acquisition during in vivo bacterial infection. *Cell Host*  
439 *Microbe* **12**, 177–186 (2012).
- 440 14. Reis, A. C. *et al.* Simultaneous repression of multiple bacterial genes using nonrepetitive  
441 extra-long sgRNA arrays. *Nat. Biotechnol.* **37**, 1294–1301 (2019).

- 442 15. Dong, C., Fontana, J., Patel, A., Carothers, J. M. & Zalatan, J. G. Synthetic CRISPR-Cas  
443 gene activators for transcriptional reprogramming in bacteria. *Nat. Commun.* **9**, 2489 (2018).
- 444 16. Roth, T. B., Woolston, B. M., Stephanopoulos, G. & Liu, D. R. Phage-Assisted Evolution of  
445 *Bacillus methanolicus* Methanol Dehydrogenase 2. *ACS Synth. Biol.* **8**, 796–806 (2019).
- 446 17. Suzuki, T. *et al.* Crystal structures reveal an elusive functional domain of pyrrolysyl-tRNA  
447 synthetase. *Nat. Chem. Biol.* **13**, 1261–1266 (2017).
- 448 18. Esvelt, K. M., Carlson, J. C. & Liu, D. R. A system for the continuous directed evolution of  
449 biomolecules. *Nature* **472**, 499–503 (2011).
- 450 19. Brödel, A. K., Rodrigues, R., Jaramillo, A. & Isalan, M. Accelerated evolution of a minimal  
451 63-amino acid dual transcription factor. *Sci Adv* **6**, eaba2728 (2020).
- 452 20. DeBenedictis, E. A., Chory, E. J., Gretton, D., Wang, B. & Esvelt, K. A high-throughput  
453 platform for feedback-controlled directed evolution. *bioRxiv* 2020.04.01.021022 (2020)  
454 doi:10.1101/2020.04.01.021022.
- 455 21. Competent Cell Essentials–10 Molecular Cloning Strategies - US.
- 456 22. Johnston, C. W., Badran, A. H. & Collins, J. J. Continuous bioactivity-dependent evolution of  
457 an antibiotic biosynthetic pathway. *Nat. Commun.* **11**, 4202 (2020).
- 458 23. Coren, J. S., Pierce, J. C. & Sternberg, N. Headful packaging revisited: the packaging of  
459 more than one DNA molecule into a bacteriophage P1 head. *J. Mol. Biol.* **249**, 176–184  
460 (1995).
- 461 24. Kittleson, J. T., DeLoache, W., Cheng, H.-Y. & Anderson, J. C. Scalable plasmid transfer  
462 using engineered P1-based phagemids. *ACS Synth. Biol.* **1**, 583–589 (2012).
- 463 25. Badran, A. H. & Liu, D. R. Development of potent in vivo mutagenesis plasmids with broad  
464 mutational spectra. *Nat. Commun.* **6**, 8425 (2015).
- 465 26. Westwater, C., Schofield, D. A., Schmidt, M. G., Norris, J. S. & Dolan, J. W. Development of  
466 a P1 phagemid system for the delivery of DNA into Gram-negative bacteria. *Microbiology*  
467 **148**, 943–950 (2002).

- 468 27. Coughlin, R. T., Tonsager, S. & McGroarty, E. J. Quantitation of metal cations bound to  
469 membranes and extracted lipopolysaccharide of Escherichia coli. *Biochemistry* **22**, 2002–  
470 2007 (1983).
- 471 28. Cvirkaite-Krupovic, V., Krupovic, M., Daugelavicius, R. & Bamford, D. H. Calcium ion-  
472 dependent entry of the membrane-containing bacteriophage PM2 into its  
473 Pseudoalteromonas host. *Virology* **405**, 120–128 (2010).
- 474 29. Tomás, J. M. & Kay, W. W. Effect of bacteriophage P1 lysogeny on lipopolysaccharide  
475 composition and the lambda receptor of Escherichia coli. *J. Bacteriol.* **159**, 1047–1052 (1984).
- 476 30. Kasman, L. M. *et al.* Overcoming the phage replication threshold: a mathematical model with  
477 implications for phage therapy. *J. Virol.* **76**, 5557–5564 (2002).
- 478 31. Taylor-Parker, J. Plasmids 101: E. coli Strains for Protein Expression.  
479 <https://blog.addgene.org/plasmids-101-e-coli-strains-for-protein-expression>.
- 480 32. Kafri, M., Metzl-Raz, E., Jona, G. & Barkai, N. The Cost of Protein Production. *Cell Rep.* **14**,  
481 22–31 (2016).
- 482 33. Fu, J. L., Kanno, T., Liang, S.-C., Matzke, A. J. M. & Matzke, M. GFP Loss-of-Function  
483 Mutations in Arabidopsis thaliana. *G3* **5**, 1849–1855 (2015).
- 484 34. Furuno, S., Watanabe-Murakami, Y., Takebe-Suzuki, N. & Yamaguchi, K. Negative control  
485 of plasmid pSC101 replication by increased concentrations of both initiator protein and  
486 iterons. *J. Gen. Appl. Microbiol.* **46**, 29–37 (2000).
- 487 35. Thompson, M. G. *et al.* Isolation and characterization of novel mutations in the pSC101 origin  
488 that increase copy number. *Sci. Rep.* **8**, 1590 (2018).
- 489 36. Pédelacq, J.-D., Cabantous, S., Tran, T., Terwilliger, T. C. & Waldo, G. S. Engineering and  
490 characterization of a superfolder green fluorescent protein. *Nat. Biotechnol.* **24**, 79–88 (2006).
- 491 37. Van der Heiden, E. *et al.* A pathway closely related to the (D)-tagatose pathway of gram-  
492 negative enterobacteria identified in the gram-positive bacterium Bacillus licheniformis. *Appl.*  
493 *Environ. Microbiol.* **79**, 3511–3515 (2013).

- 494 38. Crook, N. *et al.* In vivo continuous evolution of genes and pathways in yeast. *Nat. Commun.*  
495 **7**, 13051 (2016).
- 496 39. Gronenberg, L. S., Marcheschi, R. J. & Liao, J. C. Next generation biofuel engineering in  
497 prokaryotes. *Curr. Opin. Chem. Biol.* **17**, 462–471 (2013).
- 498 40. Beller, H. R., Lee, T. S. & Katz, L. Natural products as biofuels and bio-based chemicals:  
499 fatty acids and isoprenoids. *Nat. Prod. Rep.* **32**, 1508–1526 (2015).
- 500 41. Daeffler, K. N.-M. *et al.* Engineering bacterial thiosulfate and tetrathionate sensors for  
501 detecting gut inflammation. *Mol. Syst. Biol.* **13**, 923 (2017).
- 502 42. Fischbach, M. A. & Segre, J. A. Signaling in Host-Associated Microbial Communities. *Cell*  
503 **164**, 1288–1300 (2016).
- 504 43. Barrick Lab :: ProcedureFLPFRTRecombination.  
505 <https://barricklab.org/twiki/bin/view/Lab/ProcedureFLPFRTRecombination>.

506
